# Supplementary material for: Sodium-rich nickel–cobalt hexacyanoferrates for enhanced energy storage performance in aqueous electrolytes
Source: Royal Society of Chemistry journal article supplement (doi:10.1039/d4nj04067h), 2025-01-01
Supplement: d4nj04067h1.pdf [file d4nj04067h1.pdf]

# Sodium-rich Nickel-Cobalt Hexacyanoferrates for Enhanced Energy Storage Performance in Aqueous Electrolyte

Vu V. Thuy<sup>1,2</sup>, Nguyen T. Son<sup>1</sup>, Vu H. Ha<sup>1</sup>, Le X. Duong<sup>1</sup>, and Tran V. Thu<sup>1</sup>,✉

<sup>1</sup>Department of Chemical Engineering, Le Quy Don Technical University, 236 Hoang Quoc Viet, Hanoi 100000, Vietnam

<sup>2</sup>Graduate University of Science and Technology, Vietnam Academy of Science and Technology, 18 Hoang Quoc Viet, Cau Giay, Hanoi, Vietnam

✉Corresponding authors: E-mail: [thutv@mta.edu.vn](mailto:thutv@mta.edu.vn); Tel: +84 964 793 732

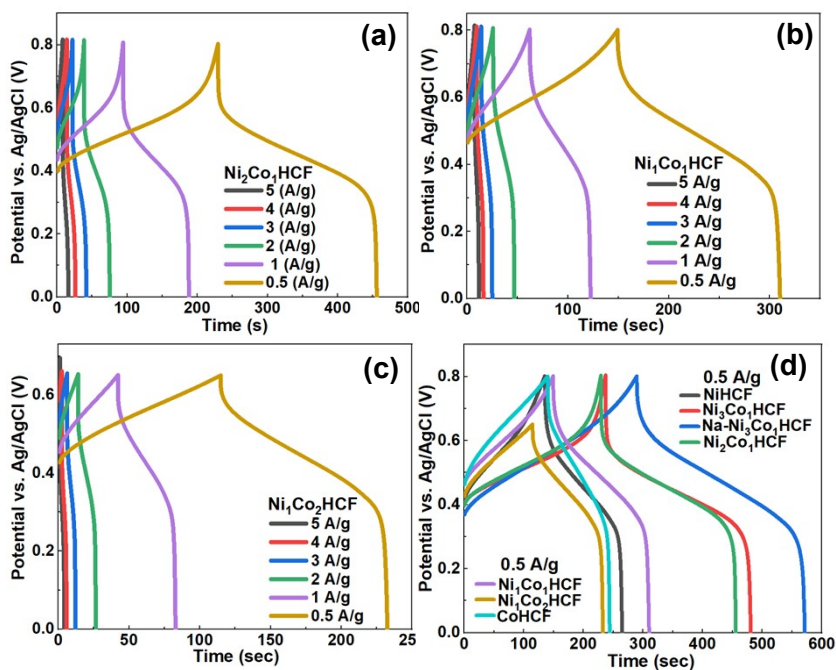

**Figure S1.** GCD curves of Ni<sub>2</sub>Co<sub>1</sub>HCF (a), Ni<sub>1</sub>Co<sub>1</sub>HCF (b), Ni<sub>1</sub>Co<sub>2</sub>HCF (c), and all materials at 0.5 A/g (d).
